# Supplementary material for: Radiomics Analysis for Multiple Myeloma: A Systematic Review with Radiomics Quality Scoring
Source: MDPI journal article supplement (doi:10.3390/diagnostics13122021), 2023-06-10
Supplement: s1 [file s1]

## **PUBMED**

(((((texture) OR (radiomics)))) AND ((multiple myeloma))) AND (("2010/01/01"[Date - Publication] :  
"2023/04/01"[Date - Publication]))

## **Scopus**

( TITLE-ABS-KEY ( radiomics ) OR TITLE-ABS-KEY ( texture ) AND TITLE-ABS-  
KEY ( multiple AND myeloma ) ) AND PUBYEAR > 2009

## **Web of science**

((ALL=(texture)) OR ALL=(radiomics))) AND ALL=(multiple myeloma)

Publication date: 01-01-2010 to 01-04-2023
